# Supplementary material
Source: PubMed Central journal article supplement (PMC2920153)
Supplement: NIHMS215077-supplement-1_si_001.pdf [file NIHMS215077-supplement-1_si_001.pdf]

## SUPPORTING INFORMATION

### A. Input file for APBS

Unless otherwise specified, all APBS computation uses the following set of parameters:

```
mg-auto, dime 513 513 513, cgcent 0 0 0, fgcent 0 0 0,  
cglen 200 200 200, fglen 100 100 100, mol 1, lpbe, bcfl  
mdh, pdie 4.0, sdie 78.0, srfm mol, chgm spl2, sdens  
10.00, srad 0.0, swin 0.30, temp 298.15, ion charge 1 conc  
0.05 radius 0.0, ion charge -1 conc 0.05 radius 0.0.
```

### B. Benchmarking – spherical cases:

The grid dimension (dime) is varied to 65, 129, 257, and 513 as per Table 2.

#### Benchmarking – two overlapping spheres:

The coarse grid length (cglen) and fine grid length (fglen) are varied as per Table A1:

Table A1. APBS parameters for two overlapping spheres benchmarks

| Sphere Size [Å] | cglen | fglen |
|-----------------|-------|-------|
| 2               | 20    | 10    |
| 5               | 50    | 20    |
| 15              | 150   | 60    |
| 50              | 500   | 200   |

### C. Brome Mosaic Virus

The fine grid length (fglen) is set to 120.
